# Supplementary material for: Providing Doctors With High-Quality Information: An Updated Evaluation of Web-Based Point-of-Care Information Summaries
Source: PubMed Central journal article supplement (PMC4738183; doi:10.2196/jmir.5234), 2016-01-19

**Multimedia Appendix 1. Flow diagram of methods used to evaluate editorial quality, evidence-based methodology and volume**

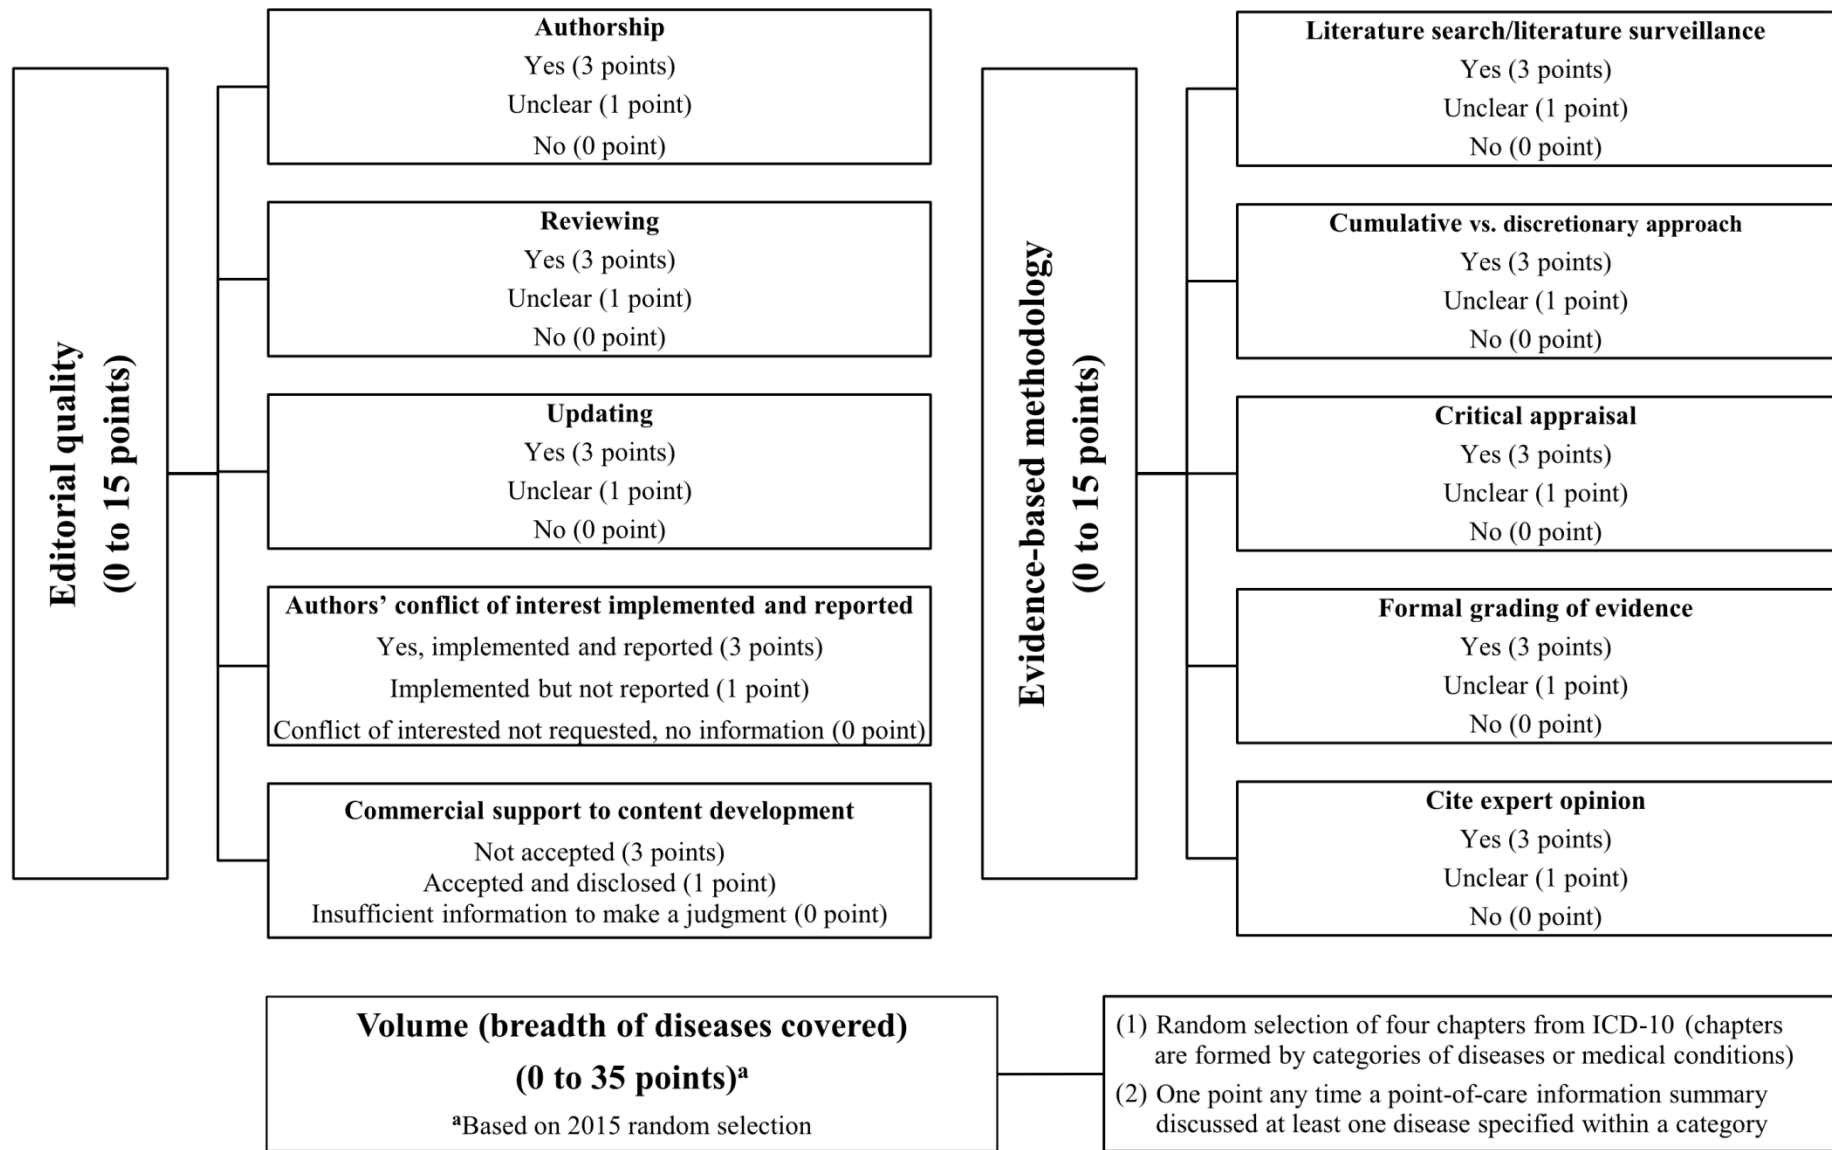

Supplement: jmir_v18i1e15_app1.pdf [file jmir_v18i1e15_app1.pdf]
