# Supplementary material for: Providing Doctors With High-Quality Information: An Updated Evaluation of Web-Based Point-of-Care Information Summaries
Source: PubMed Central journal article supplement (PMC4738183; doi:10.2196/jmir.5234), 2016-01-19
Supplement: jmir_v18i1e15_app2.pdf [file jmir_v18i1e15_app2.pdf]

**Multimedia Appendix 2. General Characteristics of point-of-care information summaries.**

| Product Name (URL)                                                                                                     | Vendor/Publisher                                             | Country     | Year of release | Marketing claim                                                                                                                                                                   | Access                                | Type of subscription        | Format desktops, tablets, and mobile devices | EHR integration | Annual cost (individual subscription)        | Target audience                                                                            |
|------------------------------------------------------------------------------------------------------------------------|--------------------------------------------------------------|-------------|-----------------|-----------------------------------------------------------------------------------------------------------------------------------------------------------------------------------|---------------------------------------|-----------------------------|----------------------------------------------|-----------------|----------------------------------------------|--------------------------------------------------------------------------------------------|
| 5 Minute Consult ( <a href="https://5minuteconsult.com">https://5minuteconsult.com</a> )                               | Wolters Kluwer                                               | Netherlands | not reported    | Five minutes is all you need                                                                                                                                                      | Fee-based                             | individual or institutional | online and mobile devices <sup>a</sup>       | yes             | \$99                                         | physicians and healthcare professionals                                                    |
| ACP Smart Medicine (ACP Pier) ( <a href="http://smartmedicine.acponline.org">http://smartmedicine.acponline.org</a> )  | American College of Physicians                               | USA         | 2013            | One Click to Confidence                                                                                                                                                           | fee-based, open access to ACP members | individual                  | online and mobile devices <sup>a</sup>       | no              | \$265                                        | healthcare professionals                                                                   |
| BestBets ( <a href="http://www.bestbets.org">http://www.bestbets.org</a> )                                             | Department of Emergency Medicine, Manchester Royal Infirmary | UK          | 1996            | Best evidence topics                                                                                                                                                              | open access                           | n/a                         | online and print                             | no              | n/a                                          | emergency medicine specialists                                                             |
| BMJ Best Practice (Clinical Evidence) ( <a href="http://bestpractice.bmj.com">http://bestpractice.bmj.com</a> )        | British Medical Journal Publishing Group Ltd.                | UK          | 2009            | Your instant second opinion                                                                                                                                                       | fee-based                             | individual or institutional | online and mobile devices <sup>b</sup>       | yes             | £142 / €192 / \$277 (plus VAT if applicable) | healthcare professionals (and medical students)                                            |
| Clin-eguide ( <a href="http://clineguide.ovid.com">http://clineguide.ovid.com</a> )                                    | Wolters Kluwer and Unbound Medicine                          | Netherlands | not reported    | Evidence-based and synoptic diagnostic and treatment recommendations for frequent and high-cost problems occurring in primary care, inpatient, and emergency department settings. | fee-based                             | not reported                | online and mobile devices <sup>b</sup>       | yes             | not reported                                 | healthcare professionals                                                                   |
| Clinical Access ( <a href="http://clinicalaccess.mhmedical.com">http://clinicalaccess.mhmedical.com</a> ) <sup>c</sup> | McGraw-Hill Global Education Holdings, LLC.                  | USA         | 2014            | Targeted answers. Better patient care.                                                                                                                                            | fee-based                             | individual or institutional | online and mobile devices <sup>a</sup>       | no              | \$395                                        | physicians, residents, nurse practitioners, and physician assistants                       |
| Clinical Key (First Consult) ( <a href="https://www.clinicalkey.com">https://www.clinicalkey.com</a> )                 | Elsevier Inc.                                                | Netherlands | 2012            | Lead with answers.                                                                                                                                                                | fee-based                             | individual or institutional | online and mobile devices <sup>a</sup>       | yes             | specialty packages from \$449 to 1248        | healthcare executives, physicians, nurses, medical librarians, and medical students        |
| Cochrane Clinical Answers ( <a href="http://cochraneclinicalanswers.com">http://cochraneclinicalanswers.com</a> )      | Cochrane Innovations Ltd. and John Wiley & Sons, Ltd.        | UK          | 2014            | Accessible, authoritative, independent                                                                                                                                            | fee-based                             | individual or institutional | online                                       | no              | contact for pricing                          | healthcare practitioners and professionals, and other informed health care decision-makers |

|                                                                                                                                                      |                                              |           |              |                                                                                                                                                                                                        |                                                                                                                                        |                             |                                                     |     |                                                      |                                                                                                                          |
|------------------------------------------------------------------------------------------------------------------------------------------------------|----------------------------------------------|-----------|--------------|--------------------------------------------------------------------------------------------------------------------------------------------------------------------------------------------------------|----------------------------------------------------------------------------------------------------------------------------------------|-----------------------------|-----------------------------------------------------|-----|------------------------------------------------------|--------------------------------------------------------------------------------------------------------------------------|
| Decision Support in Medicine<br>( <a href="https://www.decisionsupportinmedicine.com">https://www.decisionsupportinmedicine.com</a> )                | Decision Support in Medicine, LLC. and Swets | USA       | 2013         | Only the vitals at the point of care                                                                                                                                                                   | fee-based                                                                                                                              | individual                  | online and mobile devices <sup>a</sup>              | no  | \$100 per specialty program                          | medical specialists                                                                                                      |
| Dynamed ( <a href="https://dynamed.ebscohost.com">https://dynamed.ebscohost.com</a> )                                                                | EBSCO Industries, Inc.                       | USA       | not reported | The Dynamed Difference: DynaMed™ is unique among clinical information resources.                                                                                                                       | fee-based                                                                                                                              | individual or institutional | online and mobile devices <sup>b</sup>              | yes | \$99.95 - \$395 depending on profession              | physicians and other healthcare professionals                                                                            |
| EBM Guidelines<br>( <a href="https://www.essentialevidenceplus.com">https://www.essentialevidenceplus.com</a> )                                      | Wiley Blackwell Interscience and Duodecim    | Finland   | 1989         | Easy to use clinical guidelines supported by sound scientific evidence - an essential tool for the fast pace of primary care                                                                           | fee-based                                                                                                                              | individual or institutional | online and mobile devices <sup>a</sup>              | yes | \$85 (cost for Essential Evidence Plus subscription) | healthcare professionals (targets primary care, ambulatory care and community hospitals, according to NHS accreditation) |
| Essential Evidence Topics<br>( <a href="https://www.essentialevidenceplus.com">https://www.essentialevidenceplus.com</a> )                           | John Wiley & Sons, Inc.                      | UK        | 2008         | The cornerstone medical reference providing highly relevant, trusted content in a concise, structured evidenced-based format.                                                                          | fee-based                                                                                                                              | individual or institutional | online and mobile devices <sup>a</sup>              | yes | \$85 (cost for Essential Evidence Plus subscription) | physicians, nurses, and other health care professionals                                                                  |
| eTG Complete ( <a href="http://www.tg.org.au">http://www.tg.org.au</a> )                                                                             | Therapeutic Guidelines Ltd. (Australia)      | Australia | 1978         | Improving health outcomes through authoritative, practical, independent therapeutic guidance                                                                                                           | fee-based                                                                                                                              | individual or institutional | online, mobile devices <sup>a</sup> , CD, and print | no  | AUD\$335 (full price); AUD\$299 (students)           | prescribers (general practitioners and trainee physicians in particular)                                                 |
| GP Notebook ( <a href="https://www.gpnotebook.co.uk">https://www.gpnotebook.co.uk</a> ; <a href="http://www.univadis.co.uk">www.univadis.co.uk</a> ) | Oxbridge Solutions Ltd.                      | UK        | 1995         | a UK medical reference                                                                                                                                                                                 | open access for health care professionals through Univadis®, students and academics, and developing countries; fee-based to all others | n/a                         | online and mobile devices <sup>b</sup>              | no  | n/a                                                  | general practitioners                                                                                                    |
| Map of Medicine<br>( <a href="http://mapofmedicine.com">http://mapofmedicine.com</a> )                                                               | Hearst Corporation                           | UK        | 2001         | Better decision making, better care.                                                                                                                                                                   | fee-based                                                                                                                              | institutional               | online                                              | yes | contact for pricing                                  | medical professionals                                                                                                    |
| Medscape Drugs & Diseases (Emedicine)<br>( <a href="http://reference.medscape.com">http://reference.medscape.com</a> )                               | WebMD LLC.                                   | USA       | not reported | Medscape's clinical reference is the most authoritative and accessible point-of-care medical reference for physicians and healthcare professionals, available online and via all major mobile devices. | open access                                                                                                                            | n/a                         | online and mobile devices <sup>b</sup>              | no  | n/a                                                  | physicians and other healthcare professionals                                                                            |

|                                                                                                                                                                                                                                                          |                                                          |             |                                  |                                                                                                                                                                                                                            |             |                             |                                        |     |                     |                                                                                                                                                                                                      |
|----------------------------------------------------------------------------------------------------------------------------------------------------------------------------------------------------------------------------------------------------------|----------------------------------------------------------|-------------|----------------------------------|----------------------------------------------------------------------------------------------------------------------------------------------------------------------------------------------------------------------------|-------------|-----------------------------|----------------------------------------|-----|---------------------|------------------------------------------------------------------------------------------------------------------------------------------------------------------------------------------------------|
| Micromedex (with following subscriptions: Alternative Medicine, DISEASEDEX™ Emergency Medicine, DRUGDEX® System, Imprint Codes in Identidex®, Interaction Checking, Italian Drug Database) ( <a href="http://micromedex.com">http://micromedex.com</a> ) | Truven Health Analytics                                  | USA         | not reported                     | Trusted Evidence for Confident Clinical Decisions                                                                                                                                                                          | fee-based   | not reported                | online and mobile devices <sup>b</sup> | yes | contact for pricing | clinicians                                                                                                                                                                                           |
| Mosby's Nursing Consult ( <a href="http://www.nursingconsult.com">http://www.nursingconsult.com</a> )                                                                                                                                                    | Elsevier Inc.                                            | Netherlands | 2006                             | Provide the fast, accurate clinical information nurses need.                                                                                                                                                               | fee-based   | not reported                | online and mobile devices <sup>b</sup> | yes | contact for pricing | nurses                                                                                                                                                                                               |
| NICE Pathways ( <a href="http://pathways.nice.org.uk">http://pathways.nice.org.uk</a> )                                                                                                                                                                  | National Institute for Health and Care Excellence (NICE) | UK          | not reported                     | Mapping our guidance                                                                                                                                                                                                       | open access | n/a                         | online                                 | no  | n/a                 | users of NICE guidance, including health and social care professionals, public health experts, those who commission or provide health and social care services, employers, and members of the public |
| Nursing Reference Center ( <a href="http://www.ebscohost.com/nursing/products/nursing-reference-center">http://www.ebscohost.com/nursing/products/nursing-reference-center</a> )                                                                         | EBSCO Industries, Inc.                                   | USA         | not reported                     | Get the Most Current Information About Nursing Best Practices                                                                                                                                                              | fee-based   | individual or institutional | online and mobile devices <sup>b</sup> | yes | contact for pricing | practicing nurses, nursing administrators, and nursing faculty                                                                                                                                       |
| PEMSoft ( <a href="http://health.ebsco.com/products/pemsoft/clinical-decision-support">http://health.ebsco.com/products/pemsoft/clinical-decision-support</a> )                                                                                          | EBSCO Industries, Inc.                                   | USA         | 2003 (acquired by EBSCO in 2013) | The Definitive Pediatric Resource for Clinical Decision Support at the Point of Care.                                                                                                                                      | fee-based   | individual or institutional | online and mobile devices <sup>b</sup> | Yes | contact for pricing | pediatricians and other medical specialists working with neonatal, infant, child, adolescent and young adult health                                                                                  |
| PEPID Primary Care Plus Ambulatory Care ( <a href="http://www.pepid.com">http://www.pepid.com</a> )                                                                                                                                                      | PEPID, LLC.                                              | USA         | 1994                             | PEPID Primary Care Plus is a comprehensive, integrated reference tool covering all medical specialties. PCP enables you to bring all the information you need to the bedside – improving quality, safety and efficiency of | fee-based   | individual or institutional | online and mobile devices <sup>b</sup> | yes | US\$299.95          | physicians, physician assistants, nurse practitioners, and residents                                                                                                                                 |

|                                                                                                                                                                                     |                                                                                                                  |     |                          |                                                                                          |                                                     |                             |                                        |     |                                   |                                                                                                    |
|-------------------------------------------------------------------------------------------------------------------------------------------------------------------------------------|------------------------------------------------------------------------------------------------------------------|-----|--------------------------|------------------------------------------------------------------------------------------|-----------------------------------------------------|-----------------------------|----------------------------------------|-----|-----------------------------------|----------------------------------------------------------------------------------------------------|
|                                                                                                                                                                                     |                                                                                                                  |     |                          | care.                                                                                    |                                                     |                             |                                        |     |                                   |                                                                                                    |
| Prodigy (NICE Clinical Knowledge Summaries) ( <a href="http://prodigy.clarity.co.uk">http://prodigy.clarity.co.uk</a> )                                                             | Clarity Informatics (Prodigy); National Institute for Health and Care Excellence (NICE) (CKS accessed within UK) | UK  | CKS available since 1998 | Clinical guidance for common conditions and symptoms presenting in primary care          | open access to UK users, fee-based for non-UK users | individual or institutional | online                                 | no  | £100 (full price); £50 (students) | primary care physicians                                                                            |
| Rehabilitation Reference Center ( <a href="http://health.ebsco.com/products/rehabilitation-reference-center">http://health.ebsco.com/products/rehabilitation-reference-center</a> ) | EBSCO Industries, Inc.                                                                                           | USA | 2008                     | Get the Most Current Information About Sports Medicine and Rehabilitation Best Practices | fee-based                                           | individual or institutional | online                                 | yes | contact for pricing               | physical therapists, occupational therapists, speech therapists, and rehabilitation professionals. |
| UpToDate ( <a href="http://www.uptodate.com">http://www.uptodate.com</a> )                                                                                                          | UpToDate, Inc. (Wolters Kluwer)                                                                                  | USA | 1992                     | Smarter Decisions. Better Care.                                                          | fee-based                                           | individual or institutional | online and mobile devices <sup>b</sup> | yes | US\$199                           | healthcare practitioners                                                                           |
| ZynxEvidence ( <a href="http://www.zynxhealth.com">http://www.zynxhealth.com</a> )                                                                                                  | Zynx Health, Inc. (Hearst Corporation)                                                                           | USA | not reported             | Online Clinical Evidence Foundation                                                      | fee-based                                           | not reported                | online                                 | yes | not reported                      | clinicians                                                                                         |

<sup>a</sup> Point of care information summary interface adapts to mobile screens

<sup>b</sup> Separate mobile version or application available for download

<sup>c</sup> Contents based on several sources of information, including Harrison's Practice that was evaluated in 2008.
