# Supplementary material for: Providing Doctors With High-Quality Information: An Updated Evaluation of Web-Based Point-of-Care Information Summaries
Source: PubMed Central journal article supplement (PMC4738183; doi:10.2196/jmir.5234), 2016-01-19
Supplement: jmir_v18i1e15_app3.pdf [file jmir_v18i1e15_app3.pdf]

**Multimedia Appendix 3. Content Presentation of point-of-care summaries.**

| Name                         | Type of output                                                      | Formal ontology | Summary flexibility | References                | Intent to recommend | Strength of recommendation formal system | CME programs | Other educational materials (topics) | Patient handouts |
|------------------------------|---------------------------------------------------------------------|-----------------|---------------------|---------------------------|---------------------|------------------------------------------|--------------|--------------------------------------|------------------|
| 5 Minute Consult             | key point summary                                                   | yes             | yes                 | yes, specific             | yes                 | yes <sup>a</sup>                         | yes          | no                                   | yes              |
| ACP Smart Medicine           | key point summary                                                   | yes             | yes                 | yes, specific             | yes                 | no                                       | yes          | no                                   | no               |
| Best Bets                    | question and answer, evidence tables                                | yes             | no                  | yes, specific             | no                  | no                                       | no           | yes                                  | no               |
| BMJ Best Practice            | key point summary, paragraphs, question and answer, evidence tables | yes             | yes                 | yes, specific             | yes                 | yes                                      | yes          | no                                   | yes              |
| Clinical Access              | question and answer, paragraphs                                     | yes (no link)   | yes                 | yes, specific             | no                  | no                                       | no           | no                                   | no               |
| Clinical Key                 | key point summary                                                   | yes             | yes                 | yes, specific             | yes                 | no                                       | yes          | no                                   | yes              |
| Cochrane Clinical Answers    | question and answer                                                 | yes             | yes                 | yes, specific             | no                  | no                                       | no           | no                                   | no               |
| Decision Support in Medicine | question and answer, paragraphs, key point summary                  | yes             | yes                 | yes, general              | yes                 | no                                       | no           | no                                   | no               |
| Dynamed                      | key point summary                                                   | yes             | yes                 | yes, specific             | yes                 | yes                                      | yes          | no                                   | no               |
| EBM Guidelines               | key point summary                                                   | yes             | no                  | yes, general and specific | yes                 | no                                       | no           | no                                   | no               |
| Essential Evidence Topics    | key point summary                                                   | yes             | yes                 | yes, specific             | yes                 | yes <sup>a</sup>                         | yes          | no                                   | no               |
| eTG Complete                 | book chapter- like summary, key point summary                       | yes             | yes                 | yes, general              | yes                 | no                                       | no           | no                                   | no               |
| GP Notebook                  | book chapter- like summary, key point summary                       | yes             | no                  | yes, general              | no                  | no                                       | yes          | no                                   | no               |
| Map of Medicine              | clinical pathways                                                   | yes             | yes                 | yes, specific             | yes                 | no                                       | no           | no                                   | no               |
| Medscape Drugs & Diseases    | book chapter- like summary, key point summary                       | yes             | no                  | yes, general              | yes                 | no                                       | yes          | no                                   | no               |
| Micromedex                   | book chapter- like summary, key point summary, evidence tables      | no              | yes                 | yes, specific             | yes                 | yes                                      | no           | no                                   | no               |

|                                         |                                                                    |     |     |                           |     |                  |     |     |     |
|-----------------------------------------|--------------------------------------------------------------------|-----|-----|---------------------------|-----|------------------|-----|-----|-----|
| NICE Pathways                           | clinical pathways with key point summary and visual representation | yes | yes | yes, general              | yes | no               | no  | no  | yes |
| Nursing Reference Center                | book chapter- like summary, key point summary                      | no  | yes | yes, general and specific | yes | no               | yes | yes | yes |
| PEMSoft                                 | key point summary                                                  | yes | yes | yes, general              | yes | no               | no  | no  | no  |
| PEPID Primary Care Plus Ambulatory Care | key point summary                                                  | yes | yes | yes, specific             | yes | yes <sup>a</sup> | yes | yes | no  |
| Prodigy                                 | key point summary, clinical scenario                               | yes | yes | yes, general and specific | yes | no               | no  | no  | no  |
| Rehabilitation Reference Center         | key point summary                                                  | no  | yes | yes, specific             | yes | no               | no  | yes | yes |
| UpToDate                                | book chapter- like summary, key point summary                      | yes | yes | yes, specific             | yes | yes              | yes | no  | yes |

<sup>a</sup> SORT strength of recommendation taxonomy used
