# Supplementary material for: Providing Doctors With High-Quality Information: An Updated Evaluation of Web-Based Point-of-Care Information Summaries
Source: PubMed Central journal article supplement (PMC4738183; doi:10.2196/jmir.5234), 2016-01-19
Supplement: jmir_v18i1e15_app4.pdf [file jmir_v18i1e15_app4.pdf]

**Multimedia Appendix 4. Editorial quality of point-of-care information summaries.**

| <b>Name</b>                  | <b>Authorship</b> | <b>Reviewing</b>   | <b>Updating</b> | <b>Authors' conflict of interest implemented and reported</b> | <b>Commercial support to content development</b> | <b>Editorial quality score</b> |
|------------------------------|-------------------|--------------------|-----------------|---------------------------------------------------------------|--------------------------------------------------|--------------------------------|
| 5 Minute Consult             | yes (3)           | no information (0) | unclear (1)     | no (0)                                                        | not accepted (3)                                 | 7                              |
| ACP Smart Medicine           | yes (3)           | yes (3)            | yes (3)         | yes (3)                                                       | not accepted (3)                                 | 15                             |
| BestBets                     | yes (3)           | yes (3)            | no (0)          | no (0)                                                        | insufficient information to make a judgement (0) | 6                              |
| BMJ Best Practice            | yes (3)           | yes (3)            | yes (3)         | yes (3)                                                       | not accepted (3)                                 | 15                             |
| Clinical Access              | no (0)            | yes (3)            | yes (3)         | no (0)                                                        | insufficient information to make a judgement (0) | 6                              |
| Clinical Key                 | yes (3)           | yes (3)            | no (0)          | no (0)                                                        | not accepted (3)                                 | 9                              |
| Cochrane Clinical Answers    | yes (3)           | yes (3)            | yes (3)         | no (0)                                                        | not accepted (3)                                 | 12                             |
| Decision Support in Medicine | yes (3)           | unclear (1)        | unclear (1)     | no (0)                                                        | insufficient information to make a judgement (0) | 5                              |
| Dynamed                      | yes (3)           | yes (3)            | yes (3)         | yes (3)                                                       | not accepted (3)                                 | 15                             |
| EBM Guidelines               | yes (3)           | yes (3)            | yes (3)         | no (0)                                                        | not accepted (3)                                 | 12                             |
| Essential Evidence Topics    | yes (3)           | yes (3)            | yes (3)         | yes (3)                                                       | not accepted (3)                                 | 15                             |
| eTG Complete                 | yes (3)           | yes (3)            | unclear (1)     | yes (3)                                                       | not accepted (3)                                 | 13                             |
| GP Notebook                  | no (0)            | unclear (1)        | unclear (1)     | yes (3)                                                       | insufficient information to make a judgement (0) | 5                              |
| Map of Medicine              | no (0)            | yes (3)            | yes (3)         | no (0)                                                        | not accepted (3)                                 | 9                              |
| Medscape Drugs & Diseases    | yes (3)           | yes (3)            | yes (3)         | yes (3)                                                       | accepted and disclosed (1)                       | 13                             |
| Micromedex                   | no (0)            | yes (3)            | unclear (1)     | no (0)                                                        | insufficient information to make a judgement (0) | 4                              |
| NICE Pathways                | no (0)            | unclear (1)        | yes (3)         | no (0)                                                        | not accepted (3)                                 | 7                              |
| Nursing Reference Center     | yes (3)           | yes (3)            | yes (3)         | no (0)                                                        | not accepted (3)                                 | 12                             |
| PEMSoft                      | yes (3)           | yes (3)            | yes (3)         | no (0)                                                        | not accepted (3)                                 | 12                             |

|                                         |         |             |             |         |                                                  |    |
|-----------------------------------------|---------|-------------|-------------|---------|--------------------------------------------------|----|
| PEPID Primary Care Plus Ambulatory Care | yes (3) | yes (3)     | yes (3)     | no (0)  | insufficient information to make a judgement (0) | 9  |
| Prodigy                                 | no (0)  | unclear (1) | unclear (1) | no (0)  | not accepted (3)                                 | 5  |
| Rehabilitation Reference Center         | yes (3) | yes (3)     | yes (3)     | no (0)  | not accepted (3)                                 | 12 |
| UpToDate                                | yes (3) | yes (3)     | yes (3)     | yes (3) | not accepted (3)                                 | 15 |
