# Supplementary material for: Providing Doctors With High-Quality Information: An Updated Evaluation of Web-Based Point-of-Care Information Summaries
Source: PubMed Central journal article supplement (PMC4738183; doi:10.2196/jmir.5234), 2016-01-19
Supplement: jmir_v18i1e15_app5.pdf [file jmir_v18i1e15_app5.pdf]

**Multimedia Appendix 5. Evidence-based methodology of point-of-care information summaries**

| <b>Name</b>                  | <b>Literature search/literature surveillance</b> | <b>Cumulative vs. discretionary approach</b> | <b>Critical appraisal</b> | <b>Formal grading of evidence</b> | <b>Cite expert opinion</b> | <b>Total score</b> |
|------------------------------|--------------------------------------------------|----------------------------------------------|---------------------------|-----------------------------------|----------------------------|--------------------|
| 5 Minute Consult             | unclear (1)                                      | unclear (1)                                  | unclear (1)               | yes (3)                           | unclear (1)                | 7                  |
| ACP Smart Medicine           | yes (3)                                          | yes (3)                                      | yes (3)                   | yes (3)                           | yes (3)                    | 15                 |
| BestBets                     | yes (3)                                          | yes (3)                                      | yes (3)                   | yes (3)                           | yes (3)                    | 15                 |
| BMJ Best Practice            | yes (3)                                          | yes (3)                                      | yes (3)                   | yes (3)                           | yes (3)                    | 15                 |
| ClinicalAccess               | unclear (1)                                      | no (0)                                       | no (0)                    | no (0)                            | no (0)                     | 1                  |
| Clinical Key (First Consult) | unclear (1)                                      | yes (3)                                      | unclear (1)               | yes (3)                           | yes (3)                    | 11                 |
| Cochrane Clinical Answers    | unclear (1)                                      | yes (3)                                      | yes (3)                   | yes (3)                           | yes (3)                    | 13                 |
| Decision Support in Medicine | unclear (1)                                      | unclear (1)                                  | unclear (1)               | no (0)                            | no (0)                     | 3                  |
| Dynamed                      | yes (3)                                          | yes (3)                                      | yes (3)                   | yes (3)                           | yes (3)                    | 15                 |
| EBM Guidelines               | yes (3)                                          | yes (3)                                      | yes (3)                   | yes (3)                           | yes (3)                    | 15                 |
| Essential Evidence Topics    | unclear (1)                                      | yes (3)                                      | yes (3)                   | yes (3)                           | unclear (1)                | 11                 |
| eTG Complete                 | unclear (1)                                      | no (0)                                       | no (0)                    | no (0)                            | no (0)                     | 1                  |
| GP Notebook                  | unclear (1)                                      | no (0)                                       | no (0)                    | no (0)                            | no (0)                     | 1                  |
| Map of Medicine              | yes (3)                                          | yes (3)                                      | yes (3)                   | no (0)                            | yes (3)                    | 12                 |
| Medscape Drugs & Diseases    | unclear (1)                                      | no (0)                                       | no (0)                    | no (0)                            | unclear (1)                | 2                  |
| Micromedex                   | yes (3)                                          | unclear (1)                                  | yes (3)                   | yes (3)                           | unclear (1)                | 11                 |
| NICE Pathways                | unclear (1)                                      | unclear (1)                                  | unclear (1)               | unclear (1)                       | unclear (1)                | 5                  |
| Nursing Reference Center     | yes (3)                                          | yes (3)                                      | yes (3)                   | no (0)                            | unclear (1)                | 10                 |

|                                         |             |             |             |          |             |    |
|-----------------------------------------|-------------|-------------|-------------|----------|-------------|----|
| PEMSoft                                 | unclear (1) | unclear (1) | yes (3)     | no (0)   | no (0)      | 5  |
| PEPID Primary Care Plus Ambulatory Care | yes (3)     | unclear (1) | yes (3)     | yes (3)* | unclear (1) | 11 |
| Prodigy                                 | yes (3)     | yes (3)     | unclear (1) | no (0)   | unclear (1) | 8  |
| Rehabilitation Reference Center         | unclear (1) | unclear (1) | unclear (1) | no (0)   | unclear (1) | 4  |
| UpToDate                                | yes (3)     | yes (3)     | yes (3)     | yes (3)  | yes (3)     | 15 |
