# Supplementary material for: Providing Doctors With High-Quality Information: An Updated Evaluation of Web-Based Point-of-Care Information Summaries
Source: PubMed Central journal article supplement (PMC4738183; doi:10.2196/jmir.5234), 2016-01-19
Supplement: jmir_v18i1e15_app6.pdf [file jmir_v18i1e15_app6.pdf]

**Multimedia Appendix 6. Point-of-care information summary scores for editorial quality, evidence-based methodology, and volume.**

| <b>Name of product</b>                  | <b>Editorial quality score</b> | <b>Evidence-based methodology score</b> | <b>Volume (%)</b>  |
|-----------------------------------------|--------------------------------|-----------------------------------------|--------------------|
| 5 Minute Consult                        | 7                              | 7                                       | 100                |
| ACP Smart Medicine                      | 15                             | 15                                      | 77                 |
| BestBets                                | 6                              | 15                                      | 63                 |
| BMJ Best Practice                       | 15                             | 15                                      | 100                |
| Clinical Access                         | 6                              | 1                                       | 100                |
| Clinical Key                            | 9                              | 11                                      | 94                 |
| Cochrane Clinical Answers               | 12                             | 13                                      | 63                 |
| Decision Support in Medicine            | 5                              | 3                                       | 94                 |
| Dynamed                                 | 15                             | 15                                      | 100                |
| EBM Guidelines                          | 12                             | 15                                      | 97                 |
| Essential Evidence Topics               | 15                             | 11                                      | 94                 |
| eTG Complete                            | 13                             | 1                                       | 89                 |
| GP Notebook                             | 5                              | 1                                       | 100                |
| Map of Medicine                         | 9                              | 12                                      | 89                 |
| Medscape Drugs & Diseases               | 13                             | 2                                       | 97                 |
| Micromedex                              | 4                              | 11                                      | 97                 |
| NICE Pathways                           | 7                              | 5                                       | 54                 |
| Nursing Reference Center                | 12                             | 10                                      | 91                 |
| PEMSoft                                 | 12                             | 5                                       | 66                 |
| PEPID Primary Care Plus Ambulatory Care | 9                              | 11                                      | 94                 |
| Prodigy                                 | 5                              | 8                                       | 63                 |
| Rehabilitation Reference Center         | 12                             | 4                                       | 26                 |
| UpToDate                                | 15                             | 15                                      | 100                |
| <b>Median (Interquartile Range)</b>     | <b>12 (6-13)</b>               | <b>11 (4-15)</b>                        | <b>94 (66-100)</b> |
